# Supplementary material
Source: Research Square preprint supplement (doi:10.21203/rs.3.rs-9457899/v1)

**Supplemental Figure 1.**Survey Instrument.
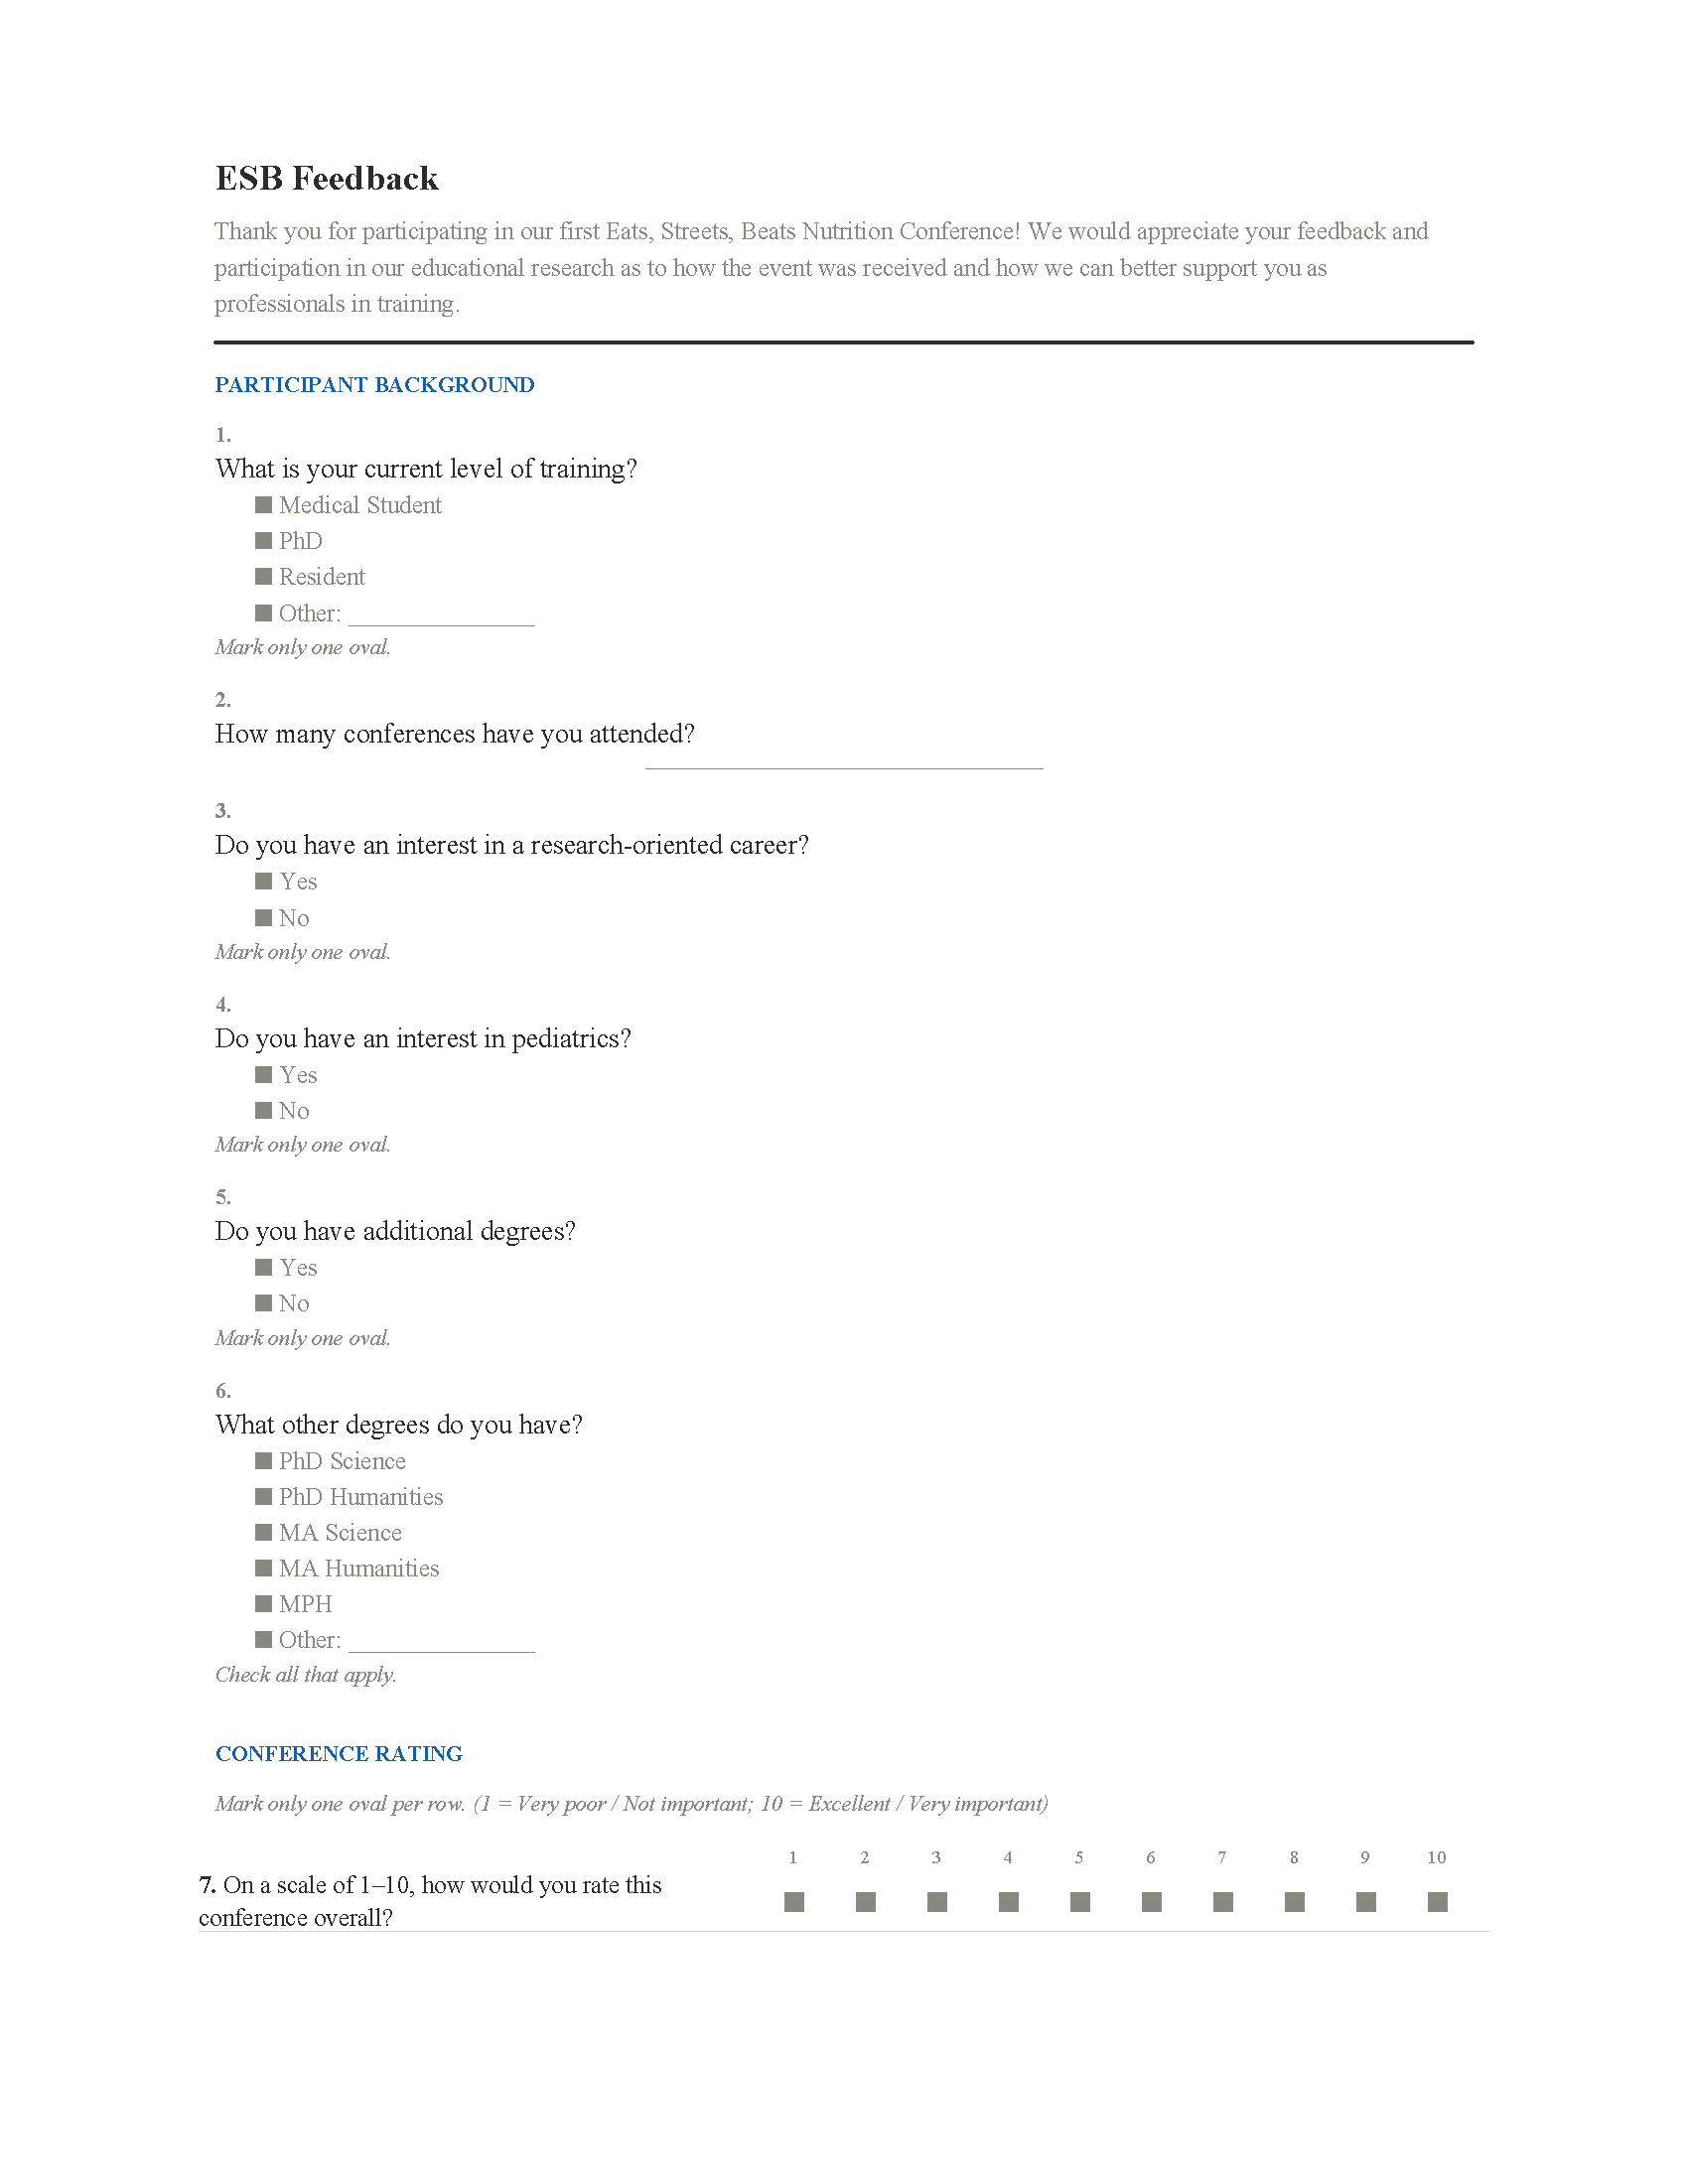

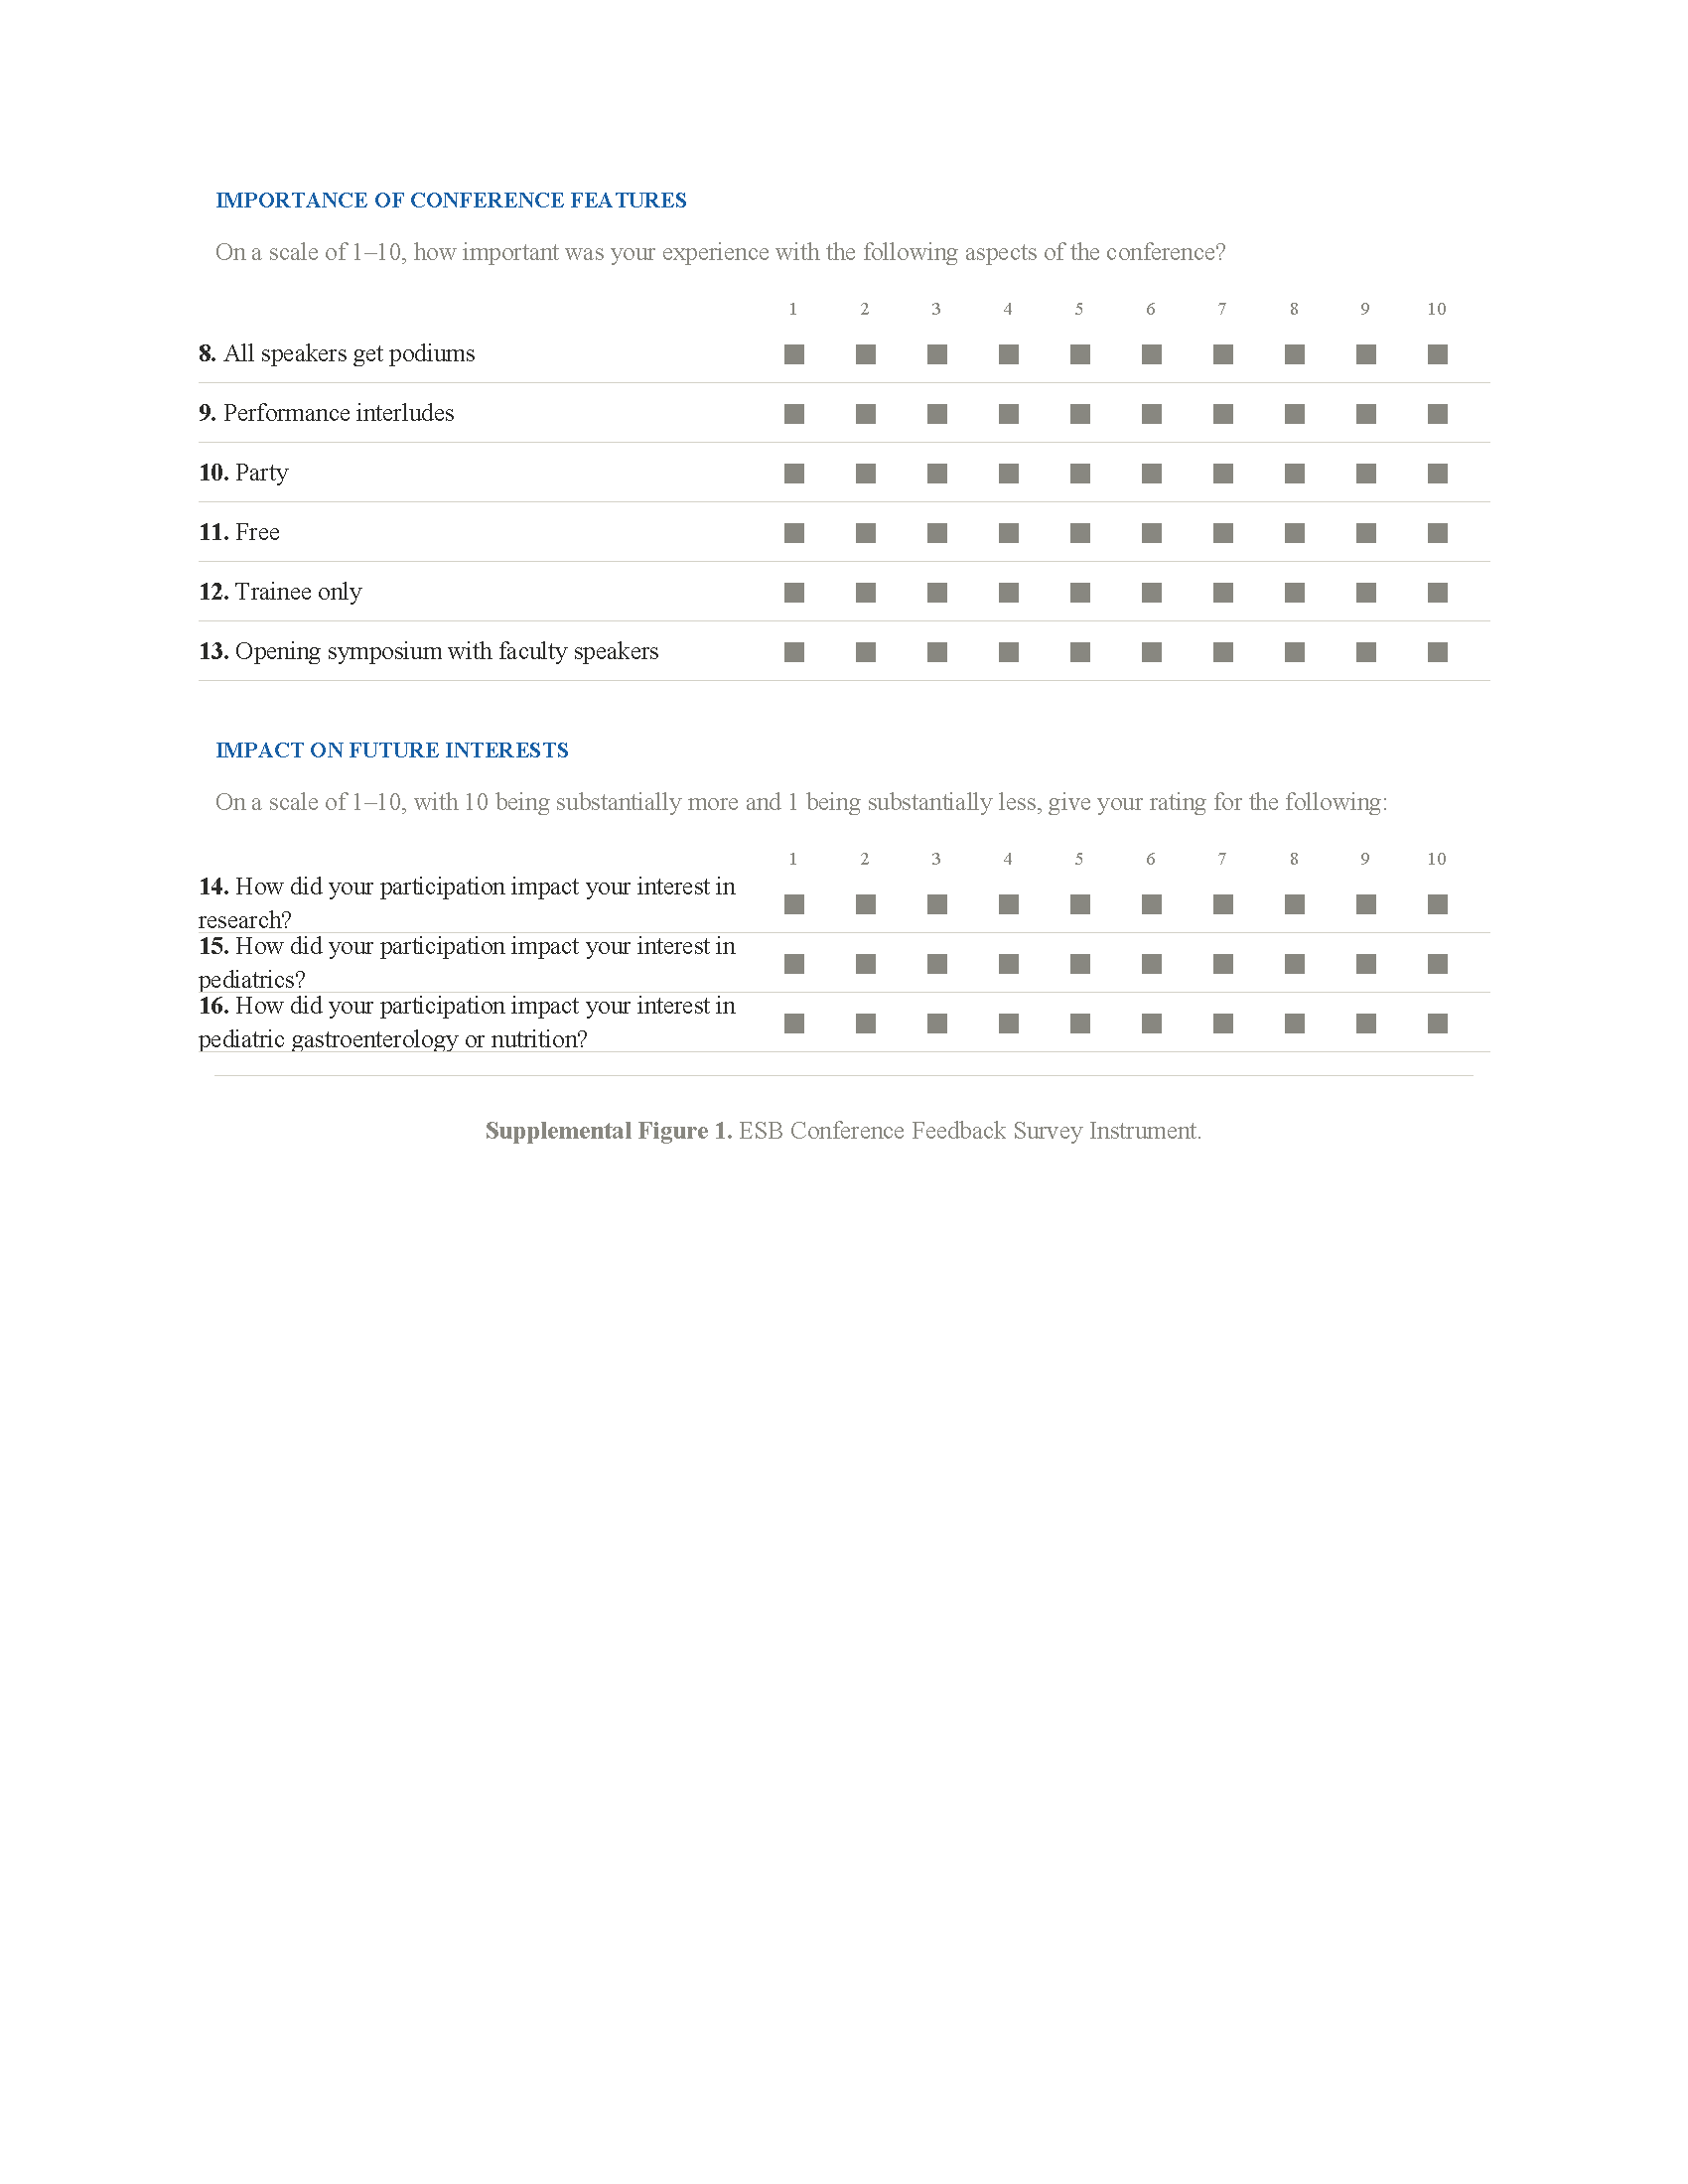

Supplement: Supplementary file 1 [file a2db62bed7bc0d48d3c93173.docx]
